# Supplementary material for: Immunomodulatory and Antioxidant Properties of Wheat Gluten Protein Hydrolysates in Human Peripheral Blood Mononuclear Cells
Source: PubMed Central journal article supplement (PMC7352691; doi:10.3390/nu12061673), 2020-06-04
Supplement: nutrients-12-01673-s001.pdf [file nutrients-12-01673-s001.pdf]

**Supplemental Table S1.** Sequences of primers used for real-time PCR analysis

| Target gene                                | Primer sequences                                                                  | PCR product (bp) | T annealing (°C) |
|--------------------------------------------|-----------------------------------------------------------------------------------|------------------|------------------|
| <i>Cytokine</i>                            |                                                                                   |                  |                  |
| <i>IL-10</i><br>NM_000572.3                | Fwd 5'-CAC GGC CTT GCT CTT GTT TT-3'<br>Rev 5'-GTG ATG CCC CAA GCT GAG A-3'       | 138              | 54               |
| <i>Antioxidant enzymes</i>                 |                                                                                   |                  |                  |
| <i>CAT</i><br>NM_001752.4                  | Fwd 5'-TAA GAC TGA CCA GGG CAT C-3'<br>Rev 5'-CAA ACC TTG GTG AGA TCG AA-3'       | 201              | 56               |
| <i>GPX</i><br>NM_000581.4                  | Fwd 5'-AGT CGG TGT ATG CCT TCT CGG-3'<br>Rev 5'-GTT CTT GGC GTT CTC CTG ATG-3'    | 227              | 60               |
| <i>GR</i><br>NM_000637.5<br>NM_001195102.2 | Fwd 5'-GCC CTG GGT TCT AAG ACA TCA-3'<br>Rev 5'-CTC AGG TCC TTG GTA TTC GGG-3'    | 275              | 56               |
| <i>SOD</i><br>NM_000454.5                  | Fwd 5'-AGG TGT GGG GAA GCA TTA-3'<br>Rev 5'-TGG TCT CCT GAG AGT GAG ATC-3'        | 241              | 56               |
| <i>Nitric Oxide-producer</i>               |                                                                                   |                  |                  |
| <i>INOS</i><br>NM_000625.4                 | Fwd 5'- TGC AGA CAC GTG CGT TAC TCC -3'<br>Rev 5'- GGT AGC CAG CAT AGC GGA TG -3' | 130              | 60               |
| <i>Housekeeping gene</i>                   |                                                                                   |                  |                  |
| <i>B-ACTIN</i><br>NM_001101.5              | Fwd 5'-AGA GCT ACG AGC TGC CTGAC-3'<br>Rev 5'-AGC ACT GTG TTG GCG TACAG-3'        | 184              | 54 - 60          |

Names of the genes with accession numbers, forward (Fwd) and reverse (Rev) sequences of the primers, numbers of base pairs (bp) of PCR products and annealing temperatures. CAT, catalase; GPX, glutathione peroxidase; GR, glutathione reductase; IL-10, interleukin-10; INOS, inducible nitric oxide synthases; SOD, superoxide dismutase; B-ACTIN, beta-actin.

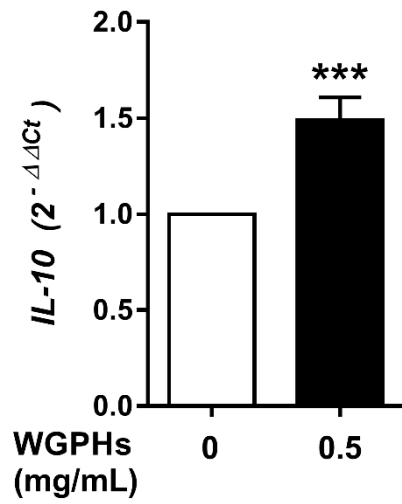

**Supplemental Fig. S1.** Relative gene expression of IL-10 in PHA-stimulated PBMCs after overnight treatment with 0.5 mg/mL WGPHs. The data represent the mean of the value calculated with respect to PHA-stimulated, untreated cells with the 2- $\Delta\Delta$ Ct method, and the standard error of the mean of each group (n= 9). \*\*\* p $\leq$ 0.001 with respect to the control group (WGPHs 0 mg/mL).
